# Supplementary material for: Identification, characterization and molecular analysis of the viable but nonculturable Rhodococcus biphenylivorans
Source: PubMed Central journal article supplement (PMC4685647; doi:10.1038/srep18590), 2015-12-21
Supplement: srep18590-s1.pdf [file srep18590-s1.pdf]

## Supplementary information

### Identification, characterization and molecular analysis of the viable but nonculturable *Rhodococcus biphenylivorans*

Xiaomei Su<sup>1,2</sup>, Faqian Sun<sup>1,2</sup>, Yalin Wang<sup>1,2</sup>, Muhammad Zaffar Hashmi<sup>3</sup>, Li Guo<sup>1,2</sup>, Linxian Ding<sup>4</sup>, Chaofeng Shen<sup>1,2\*</sup>

<sup>1</sup>Department of Environmental Engineering, College of Environmental and Resource Sciences, Zhejiang University, Hangzhou 310058, China

<sup>2</sup>Key Laboratory for Water Pollution Control and Environmental Safety, Zhejiang Province, China

<sup>3</sup>Department of Meteorology, COMSATS Institute of Information Technology, Islamabad 44000, Pakistan

<sup>4</sup>College of Geography and Environmental Science, Zhejiang Normal University, Jinhua 321004, China

\*Corresponding author: Chaofeng Shen

Address: Yuhangtang Road 866#, Hangzhou, 310058, China

E-mail: ysxzt@zju.edu.cn; purple@zju.edu.cn

Tel: +86-571-88982016

Fax: +86-571-88982010

**Table S1.** qPCR primers used in this study.

**Table S2.** Gene expression value of annotated genes.

**Table S3.** Differentially expressed genes.

**Table S4.** Genes >20 fold up- or down-regulated in t\_TG9 versus c\_TG9 cultures.

**Table S5.** Gene Ontology function of differentially expressed genes.

**Table S6.** GO enrichment analysis of up-regulated genes.

**Table S7.** GO enrichment analysis of down-regulated genes.

**Table S8.** KEGG pathway enrichment of differentially expressed genes in t\_TG9 and c\_TG9 libraries.

**Table S9.** KEGG enrichment analysis of up-regulated genes.

**Table S10.** KEGG enrichment analysis of down-regulated genes.

**Table S11.** qRT-PCR validation of transcriptomic profiles.

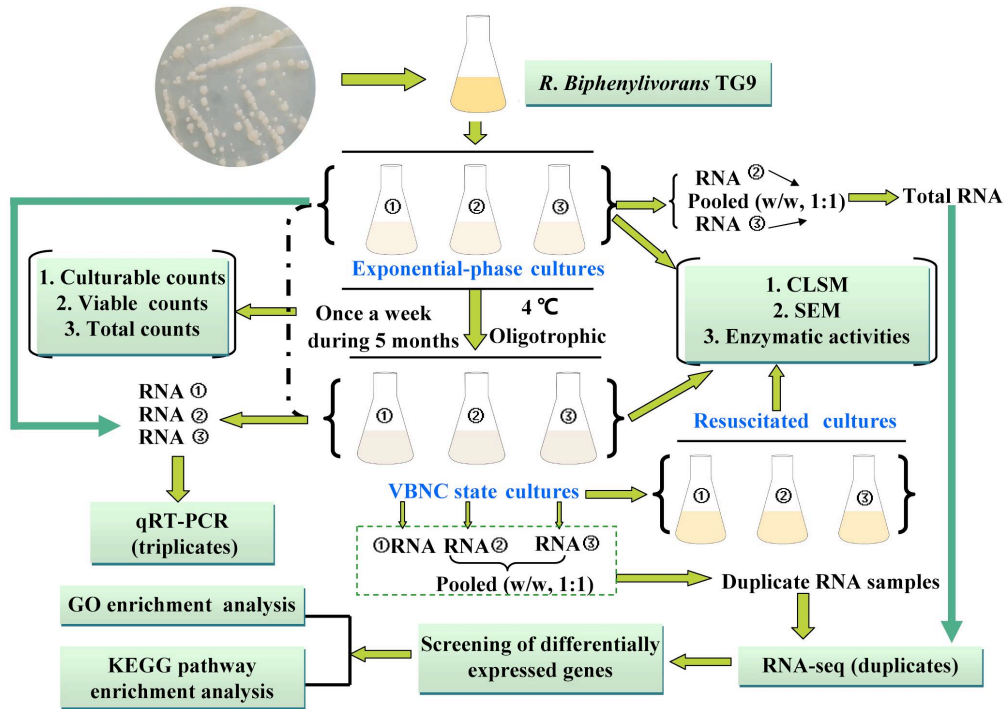

**Fig. S1.** Schematic flow diagram of the experimental design.

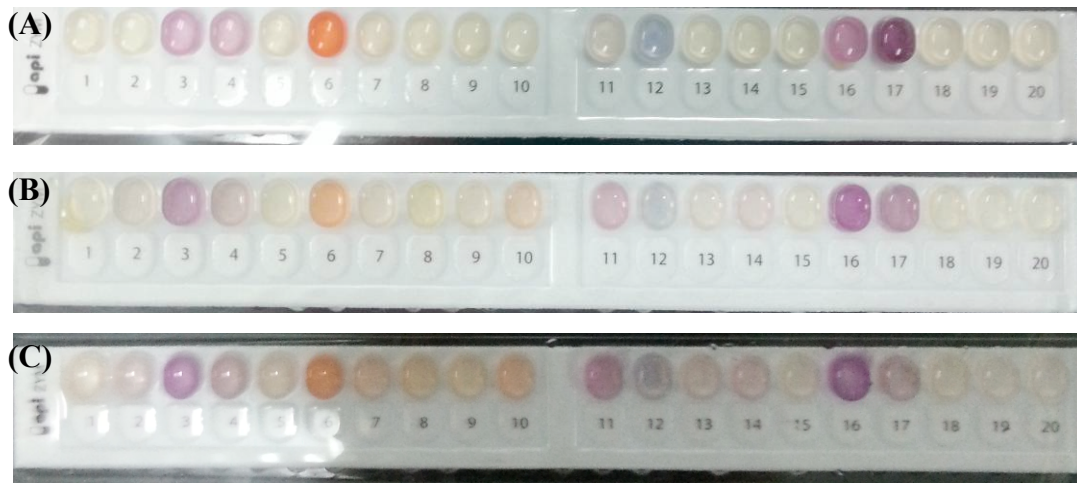

**Fig. S2.** Enzymatic activities of *Rhodococcus biphenylivorans* TG9<sup>T</sup> measured by the API ZYM system. (A) exponential-phase cells; (B) VBNC cells; (C) resuscitated cells.
